# Supplementary material
Source: HighWire-hosted journal article supplement (https://bmjopensem.bmj.com/content/suppl/2022/05/04/8.2.e001319)
Supplement: bmjsem-2022-001319supp001_data_supplement.pdf [file bmjsem-2022-001319supp001_data_supplement.pdf]

## Supplemental material

Table S1: Recommendations during lockdown and/or domestic isolation[11]

| Aerobic training/endurance training |  |               |                                                        |                                                                                             |                                                                 |  |
|-------------------------------------|--|---------------|--------------------------------------------------------|---------------------------------------------------------------------------------------------|-----------------------------------------------------------------|--|
| Population                          |  | Intensity     |                                                        | Frequency                                                                                   | Examples                                                        |  |
| Without pre-existing conditions     |  | moderate      | 70–90% <sup>1</sup> HRmax                              | 3–7 sessions/week at 30–60 min (150 min/week)                                               | walking, running/jogging, swimming, cycling, circuit training   |  |
| With pre-existing conditions        |  | low           | 40–59% <sup>1</sup> HRmax                              | 5–7 sessions/week at 30 min (150 min/week)                                                  |                                                                 |  |
| Athletes                            |  | moderate      | 75–80% <sup>1</sup> HRmax                              | 3–4 sessions/week at 60 min                                                                 |                                                                 |  |
| Strength training                   |  |               |                                                        |                                                                                             |                                                                 |  |
| Adults                              |  | moderate      | 30–50% <sup>2</sup> RM1 [up to 80%] with light weights | 2–3 sessions/week at 30 min with 2–3 sets at 20 repetitions or 1–2 sets at 5–15 repetitions | Stair climbing, push-ups, squats, dumbbells, abdominal training |  |
| ≥ 65 yrs.                           |  | moderate      | 30–50% <sup>2</sup> RM1                                | 2–3 sessions/week at 15 minutes.<br>3 Sets at least 12 repetitions                          |                                                                 |  |
| Balance and meditation              |  |               |                                                        |                                                                                             |                                                                 |  |
| ≥ 18 yrs.                           |  | not specified |                                                        | 2–3 sessions/week                                                                           | Line walking, tip-toeing on unstable elements, tai chi          |  |

<sup>1</sup> HRmax = maximum heart rate (220-age in years without beta block); <sup>2</sup> RM1 = one-repetition-maximum

(1 repetition, which can be completed with maximum weight)

Table S2: Severity of somatic symptoms (in relation to different factors/groups)

| Severity of Symptoms                  |               | B      | Standard error | Significance | OR          | 95% Confidence interval |             |
|---------------------------------------|---------------|--------|----------------|--------------|-------------|-------------------------|-------------|
| Nagelkerke Pseudo-R <sup>2</sup> 5,4% |               |        |                |              |             | Lower limit             | Upper limit |
| <b>Mild</b>                           | Age (in yrs.) | -0.004 | 0.004          | .329         | 1.00        | 0.99                    | 1.00        |
|                                       | Sex           | -0.278 | 0.119          | <b>.020</b>  | <b>0.76</b> | 0.60                    | 0.96        |

|                 |                                                  |        |       |                  |             |      |      |
|-----------------|--------------------------------------------------|--------|-------|------------------|-------------|------|------|
|                 | Chronic diseases<br>yes/no                       | -0.313 | 0.149 | <b>.036</b>      | <b>0.73</b> | 0.55 | 0.98 |
|                 | Physically active pre-<br>pandemic yes/no        | -0.022 | 0.131 | .867             | 0.98        | 0.76 | 1.27 |
|                 | <b>Physically active<br/>during quarantine</b>   | -0.419 | 0.14  | <b>.003</b>      | <b>0.66</b> | 0.50 | 0.87 |
|                 | <b>Physically inactive<br/>during quarantine</b> | 0      | .     | .                | <b>Ref.</b> | .    | .    |
| <b>Moderate</b> | Age (in yrs.)                                    | -0.009 | 0.004 | <b>.033</b>      | <b>0.99</b> | 0.98 | 1.00 |
|                 | Sex                                              | -0.385 | 0.12  | <b>.001</b>      | <b>0.68</b> | 0.54 | 0.86 |
|                 | Chronic diseases<br>yes/no                       | -0.199 | 0.151 | .189             | 0.82        | 0.61 | 1.10 |
|                 | Physically active pre-<br>pandemic yes/no        | -0.055 | 0.131 | .674             | 0.95        | 0.73 | 1.22 |
|                 | <b>Physically active<br/>during quarantine</b>   | -0.931 | 0.149 | <b>&lt; .001</b> | <b>0.39</b> | 0.29 | 0.53 |
|                 | <b>Physically inactive<br/>during quarantine</b> | 0      | .     | .                | <b>Ref.</b> | .    | .    |
| <b>Severe</b>   | age (in yrs.)                                    | -0.002 | 0.005 | .713             | 1.00        | 0.99 | 1.01 |
|                 | Sex                                              | -0.624 | 0.135 | <b>&lt; .001</b> | <b>0.54</b> | 0.41 | 0.70 |
|                 | Chronic diseases<br>yes/no                       | -0.688 | 0.158 | <b>&lt; .001</b> | <b>0.50</b> | 0.37 | 0.69 |
|                 | Physically active pre-<br>pandemic yes/no        | 0.045  | 0.143 | .753             | 1.05        | 0.79 | 1.38 |
|                 | <b>Physically active<br/>during quarantine</b>   | -1.367 | 0.193 | <b>&lt; .001</b> | <b>0.26</b> | 0.18 | 0.37 |
|                 | <b>Physically inactive<br/>during quarantine</b> | 0      | .     | .                | <b>Ref.</b> | .    | .    |

Table S3: Psychological symptoms (in relation to different factors/groups)

| Psychological symptoms                      | B     | Standard error | Significance | OR          | 95% Confidence interval |             |
|---------------------------------------------|-------|----------------|--------------|-------------|-------------------------|-------------|
|                                             |       |                |              |             | Lower limit             | Upper limit |
| <b>Nagelkerke Pseudo-R<sup>2</sup> 3,5%</b> |       |                |              |             |                         |             |
| Age (in yrs.)                               | 0.003 | 0.004          | .510         | 1.00        | 0.99                    | 1.01        |
| Sex                                         | 0.419 | 0.127          | <b>.001</b>  | <b>1.52</b> | 1.19                    | 1.95        |

|                                              |          |       |        |             |      |      |
|----------------------------------------------|----------|-------|--------|-------------|------|------|
| Chronic diseases yes/no                      | 0.552    | 0.133 | < .001 | 1.74        | 1.34 | 2.25 |
| Physically active pre-pandemic yes/no        | 0.011    | 0.129 | .933   | 1.01        | 0.79 | 1.30 |
| <b>Physically active during quarantine</b>   | -0.725   | 0.198 | < .001 | <b>0.48</b> | 0.33 | 0.71 |
| <b>Physically inactive during quarantine</b> | <b>0</b> |       |        | <b>Ref.</b> |      |      |

Table S4: Persistent symptoms (in relation to different factors/groups)

|                                              | <b>B</b> | <b>Standard error</b> | <b>Significance</b> | <b>OR</b>   | <b>95% Confidence interval</b> |                    |
|----------------------------------------------|----------|-----------------------|---------------------|-------------|--------------------------------|--------------------|
|                                              |          |                       |                     |             | <b>Lower limit</b>             | <b>Upper limit</b> |
| <b>Nagelkerke Pseudo-R<sup>2</sup></b>       |          |                       |                     |             |                                |                    |
| <b>3.1%</b>                                  |          |                       |                     |             |                                |                    |
| Age (in yrs.)                                | -0.003   | 0.007                 | .715                | 1.00        | 0.98                           | 1.01               |
| Sex                                          | 0.473    | 0.206                 | <b>.022</b>         | <b>1.60</b> | 1.07                           | 2.40               |
| Chronic diseases yes/no                      | 0.317    | 0.218                 | .147                | 1.37        | 0.90                           | 2.11               |
| Physically active pre-pandemic yes/no        | 0.123    | 0.206                 | .549                | 1.13        | 0.76                           | 1.70               |
| <b>Physically active during quarantine</b>   | -1.441   | 0.427                 | <.001               | <b>0.24</b> | 0.10                           | 0.55               |
| <b>Physically inactive during quarantine</b> | <b>0</b> |                       |                     | <b>Ref.</b> |                                |                    |
